# Supplementary material for: Post-Little Ice Age rock wall permafrost evolution in Norway
Source: Copernicus journal article supplement (doi:10.5194/tc-17-2725-2023), 2023-07-13
Supplement: Supplementary file 1 [file tc-17-2725-2023-supplement.pdf]

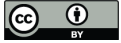

*Supplement of*

## **Post-Little Ice Age rock wall permafrost evolution in Norway**

**Justyna Czekirda et al.**

*Correspondence to:* Justyna Czekirda ([justyna.czekirda@geo.uio.no](mailto:justyna.czekirda@geo.uio.no))

The copyright of individual parts of the supplement might differ from the article licence.

Supplementary Figures

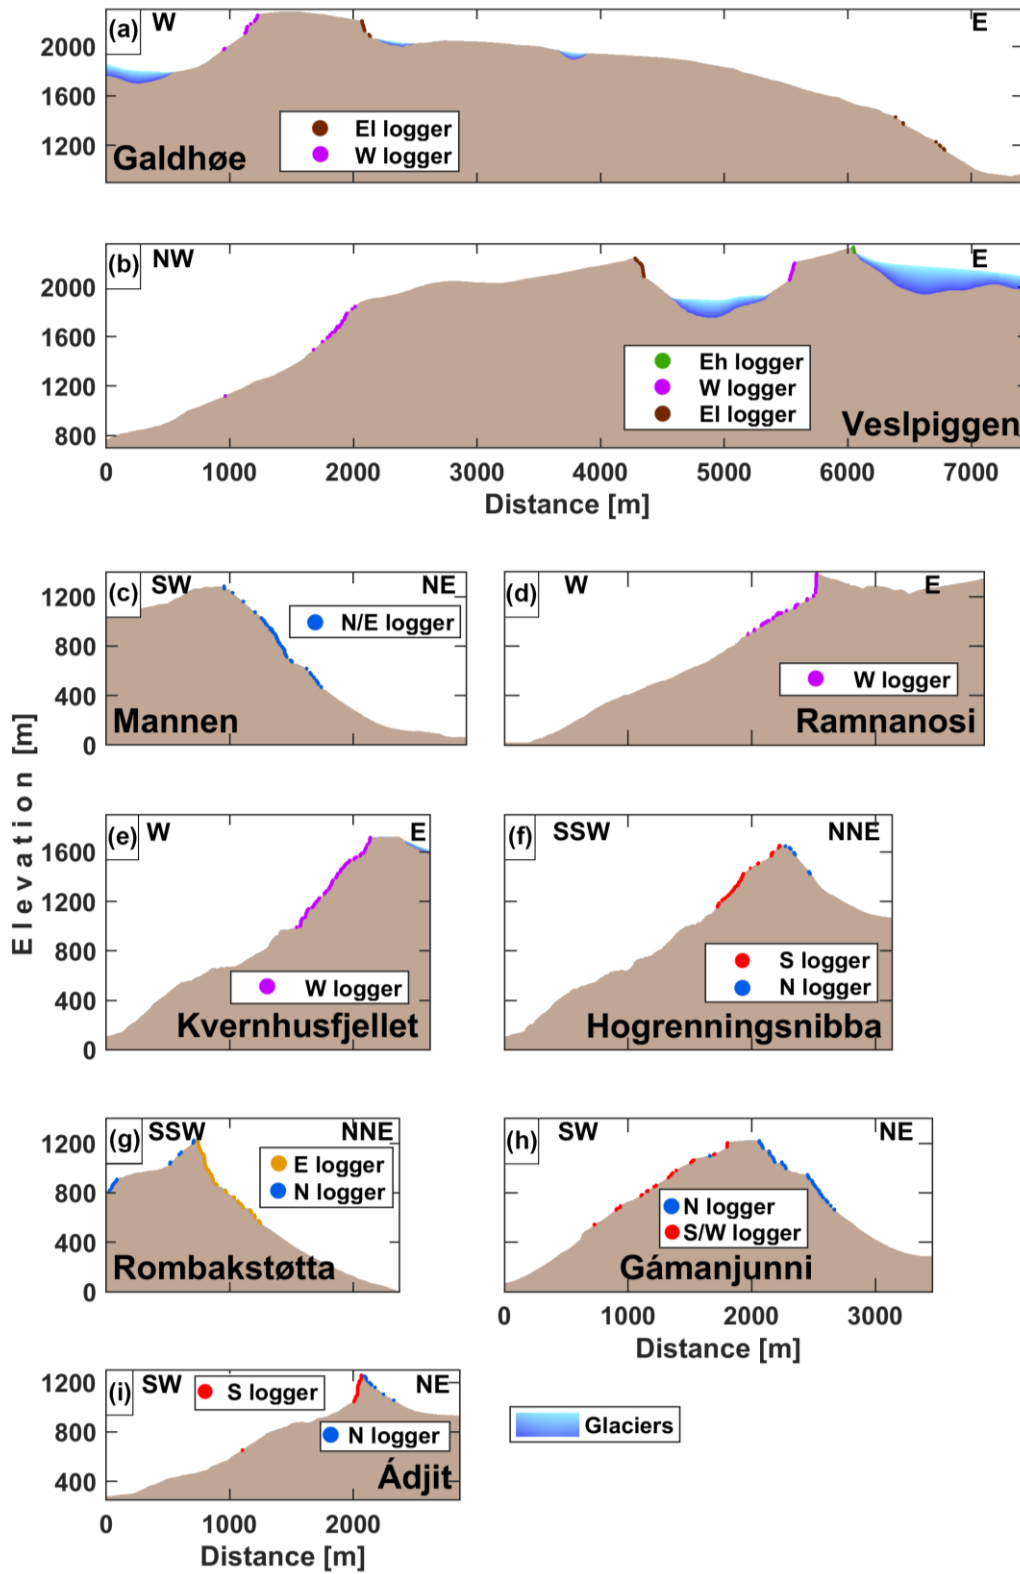

Supplementary Figure S1. Logger data used for the computation of surface offsets arising from the incoming solar shortwave radiation along profiles. E – east-facing logger, N – north-facing logger, S – south-facing logger, W – west-facing logger, suffix “h” – at a higher elevation, suffix “l” – at a lower elevation.

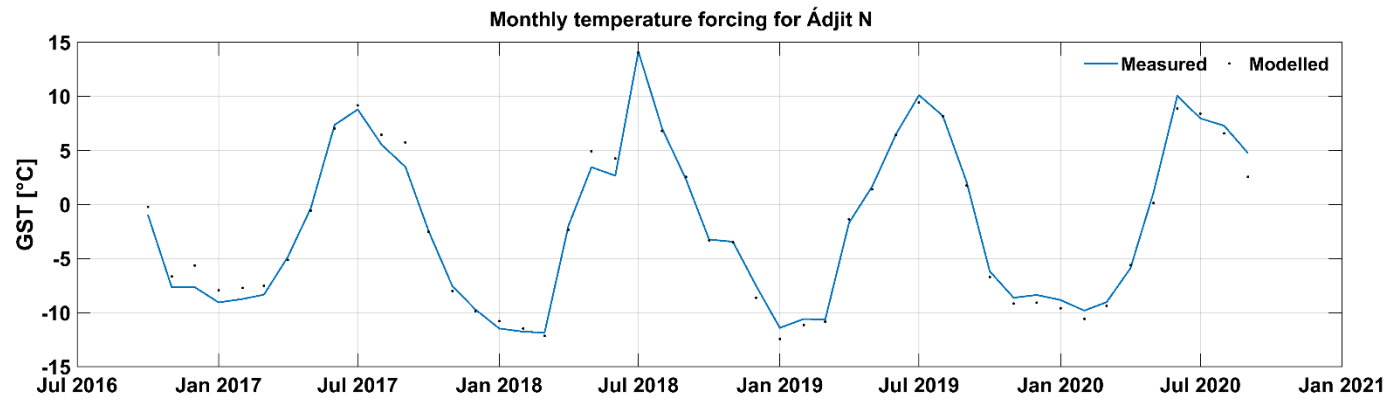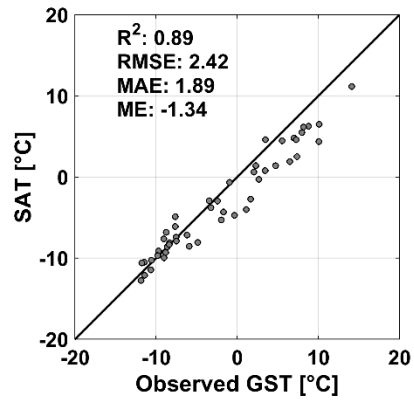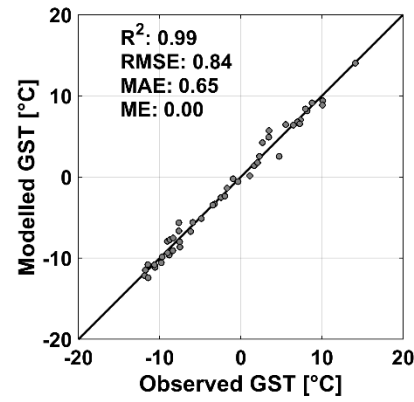

Supplementary Figure S2. Calibration for the north-facing logger at Ádjit. GST-ground surface temperature. SAT-surface air temperature. RMSE-root mean square error. MAE-mean absolute error. ME-mean error.

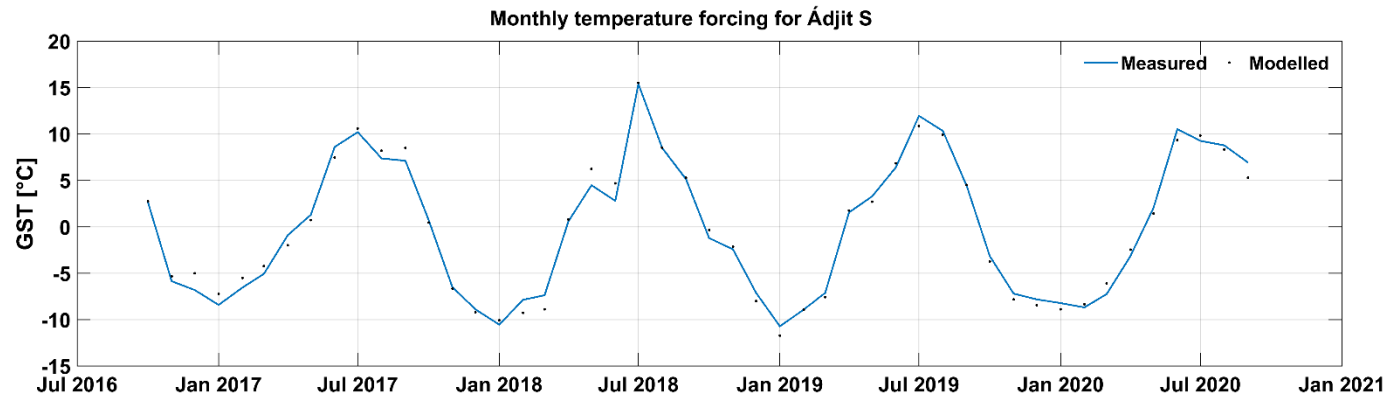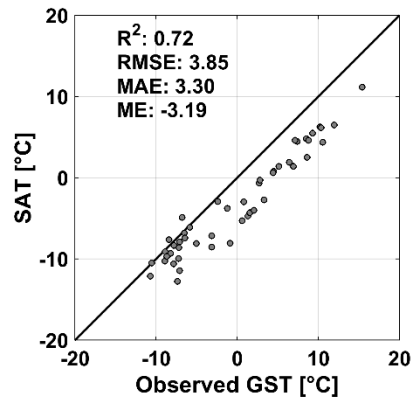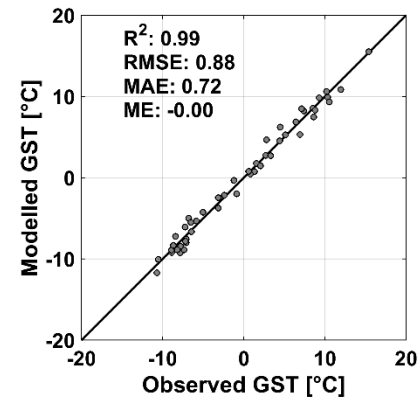

Supplementary Figure S3. Calibration for the higher south-facing logger at Ádjit. GST-ground surface temperature. SAT-surface air temperature. RMSE-root mean square error. MAE-mean absolute error. ME-mean error.

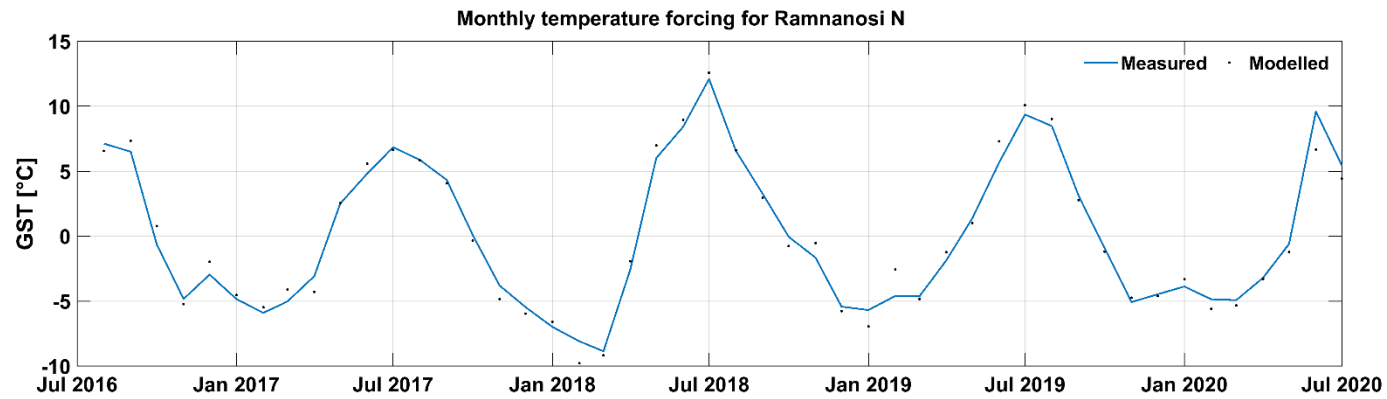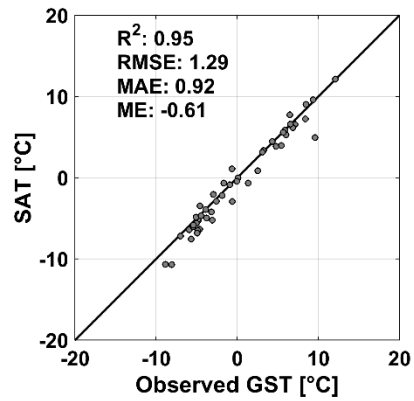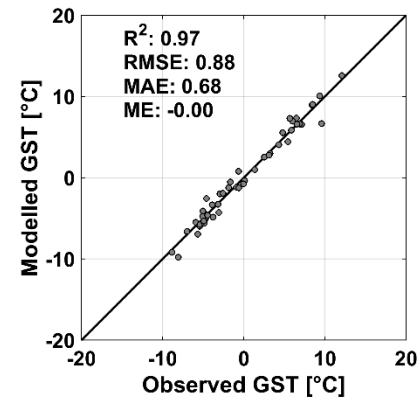

Supplementary Figure S4. Calibration for the north-facing logger at Ramnanosi. GST-ground surface temperature. SAT-surface air temperature. RMSE-root mean square error. MAE-mean absolute error. ME-mean error.

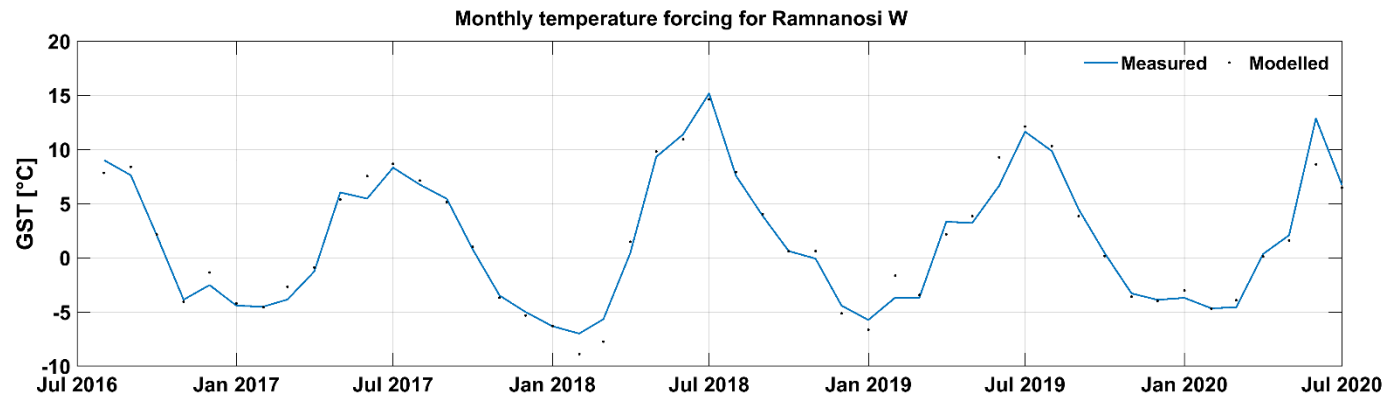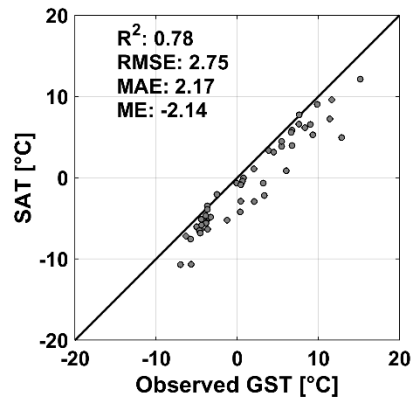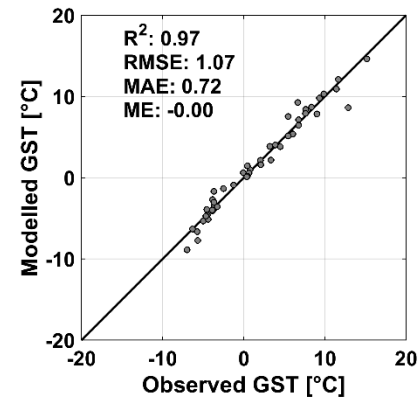

Supplementary Figure S5. Calibration for the west-facing logger at Ramnanosi. GST-ground surface temperature. SAT-surface air temperature. RMSE-root mean square error. MAE-mean absolute error. ME-mean error.

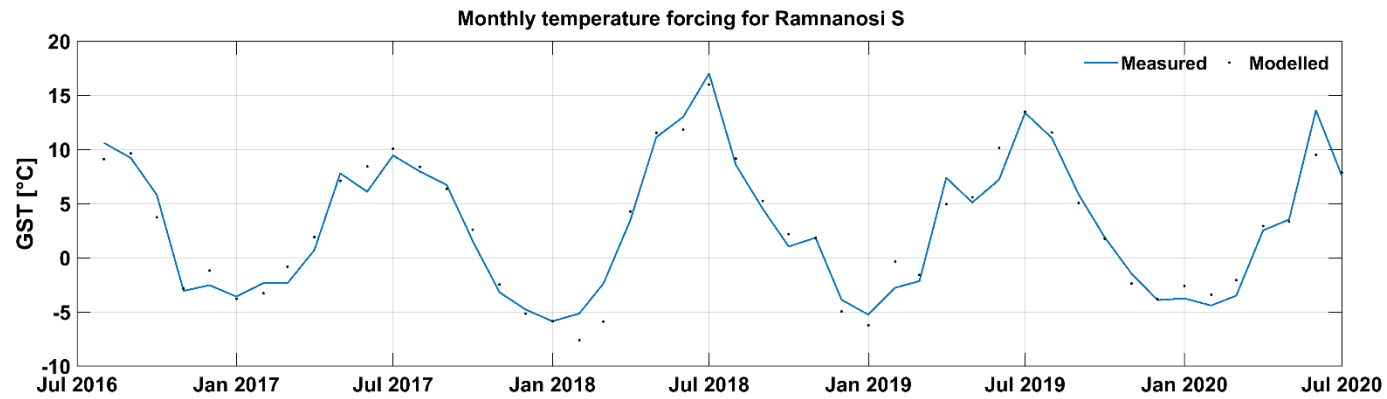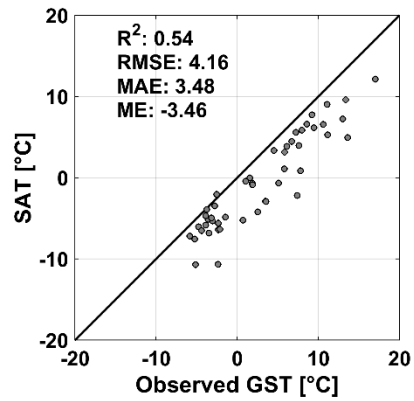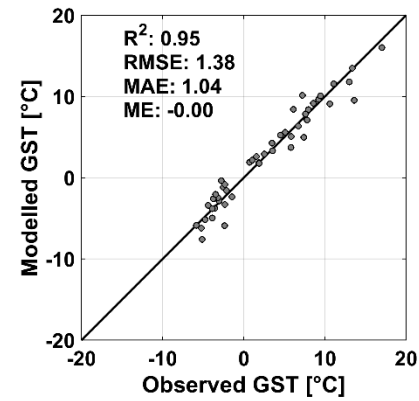

Supplementary Figure S6. Calibration for the south-facing logger at Ramnanosi. GST-ground surface temperature. SAT-surface air temperature. RMSE-root mean square error. MAE-mean absolute error. ME-mean error.

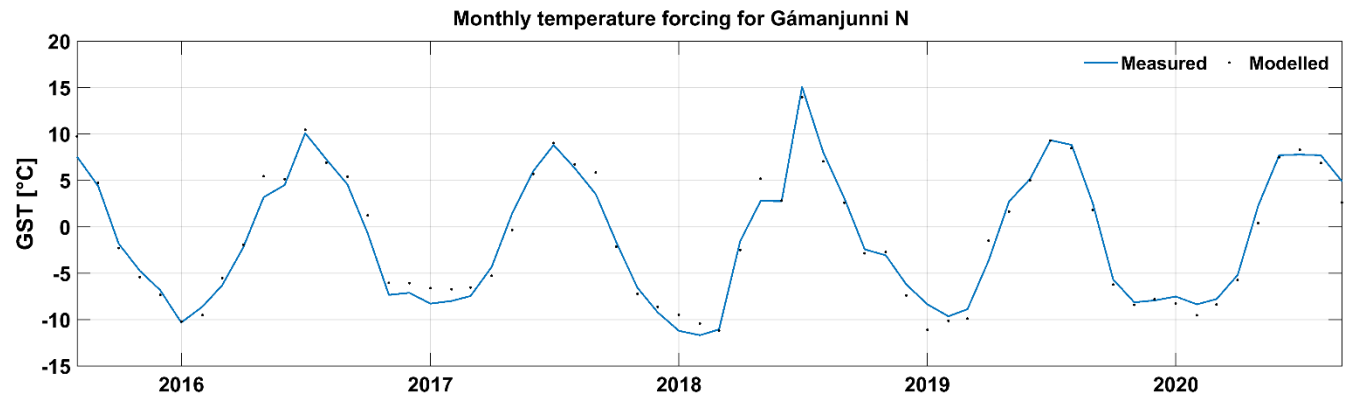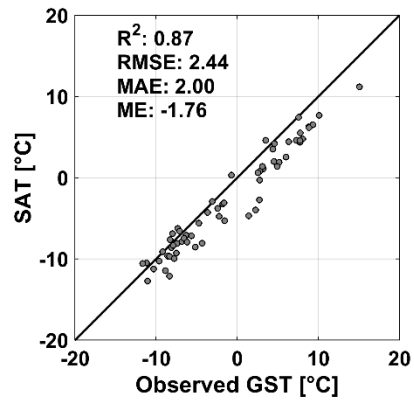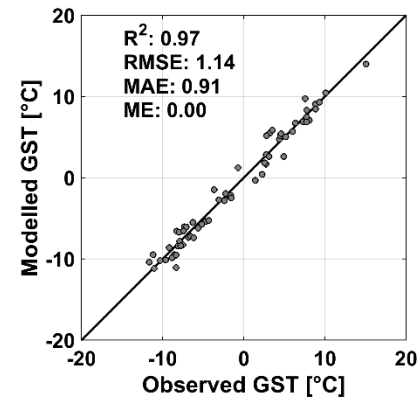

Supplementary Figure S7. Calibration for the north-facing logger at Gámanjunni. GST-ground surface temperature. SAT-surface air temperature. RMSE-root mean square error. MAE-mean absolute error. ME-mean error.



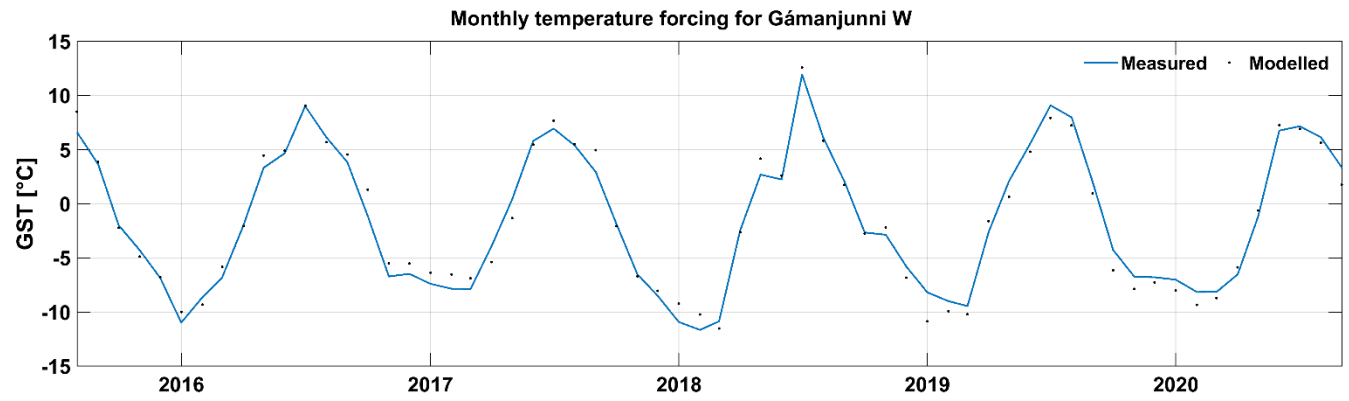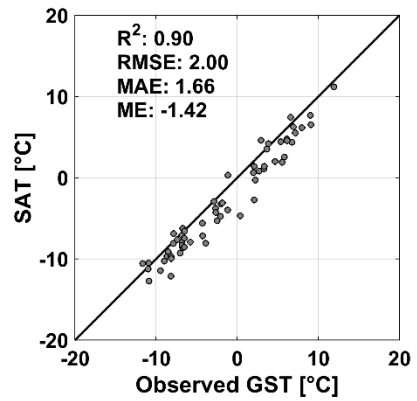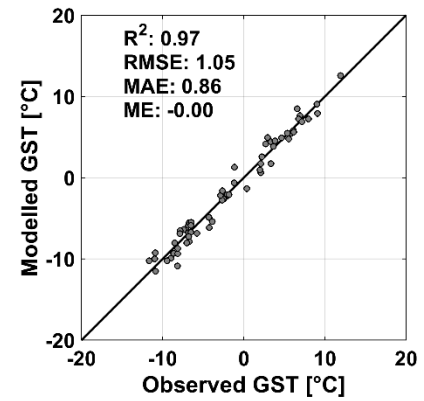

Supplementary Figure S8. Calibration for the west-facing logger at Gámanjuni. GST-ground surface temperature. SAT-surface air temperature. RMSE-root mean square error. MAE-mean absolute error. ME-mean error.

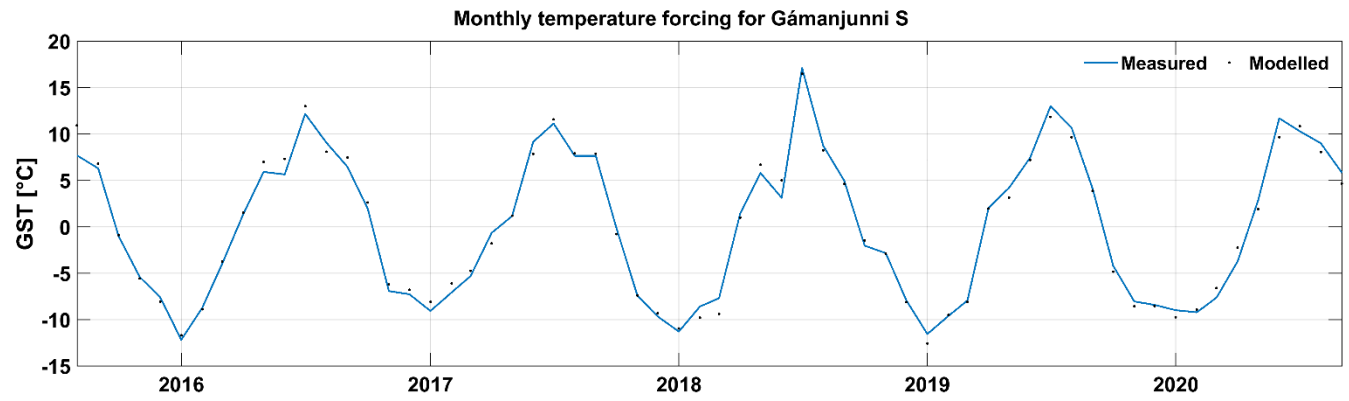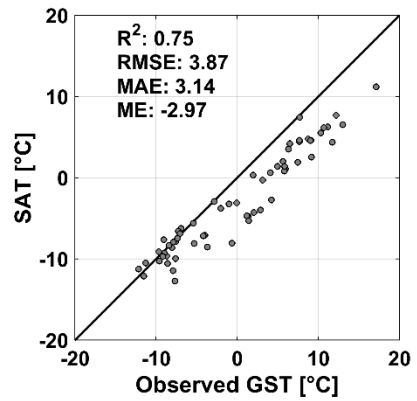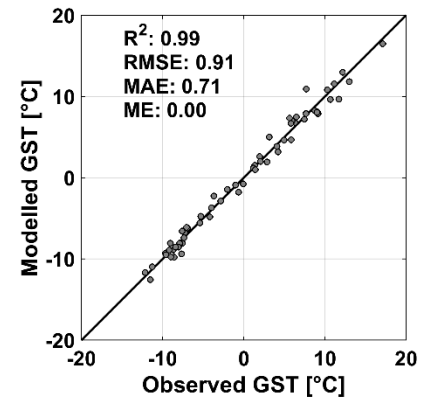

Supplementary Figure S9. Calibration for the south-facing logger at Gámanjunni. GST-ground surface temperature. SAT-surface air temperature. RMSE-root mean square error. MAE-mean absolute error. ME-mean error.

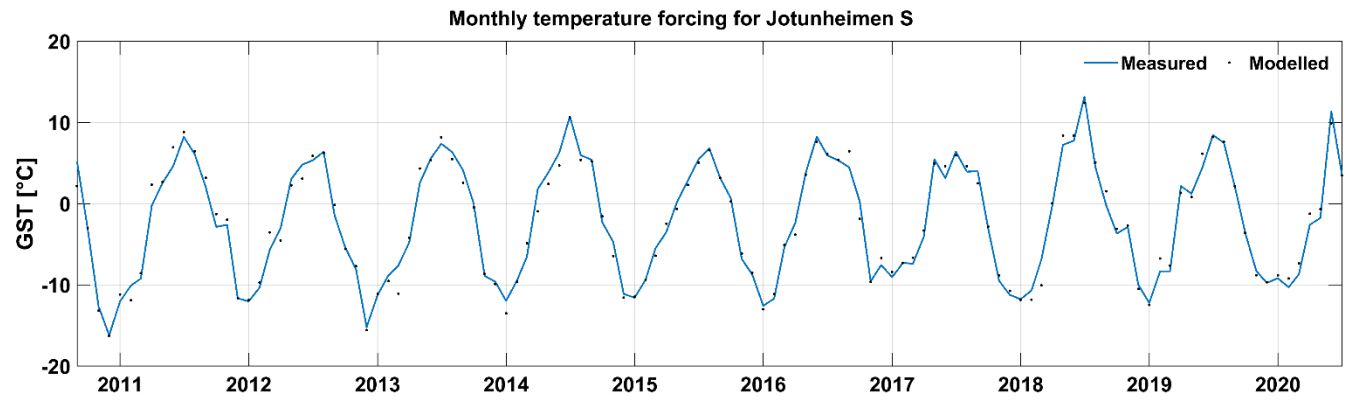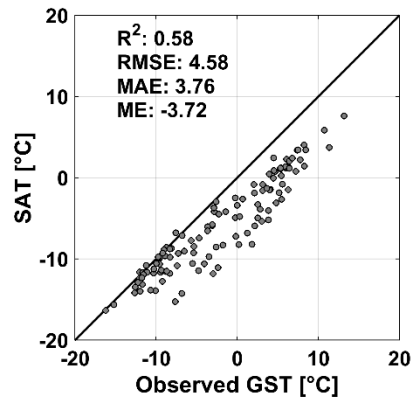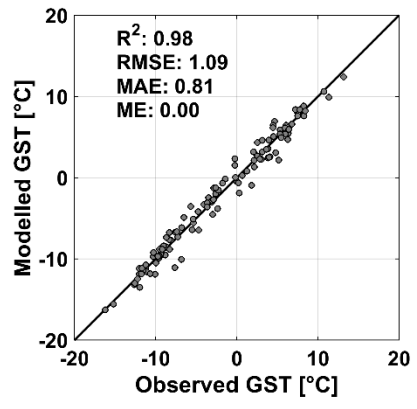

Supplementary Figure S10. Calibration for the south-facing logger at Jotunheimen. GST-ground surface temperature. SAT-surface air temperature. RMSE-root mean square error. MAE-mean absolute error. ME-mean error.

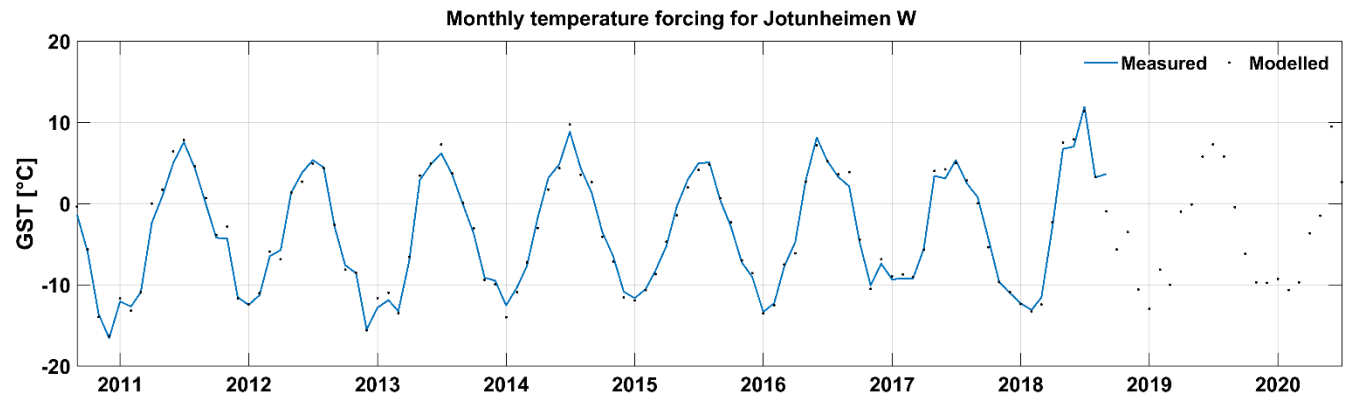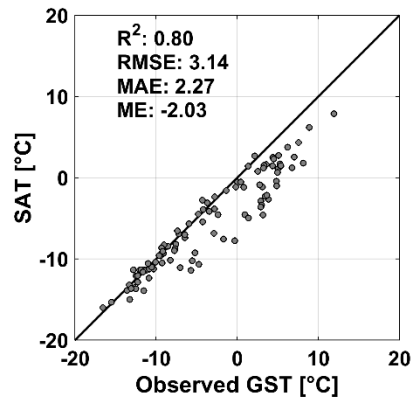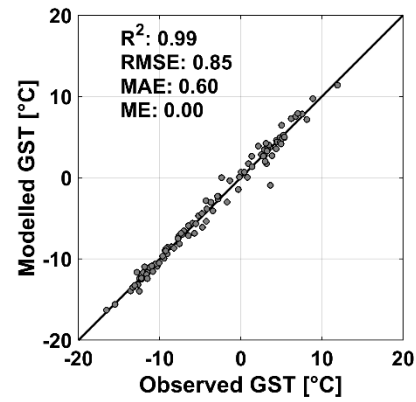

Supplementary Figure S11. Calibration for the west-facing logger at Jotunheimen. GST-ground surface temperature. SAT-surface air temperature. RMSE-root mean square error. MAE-mean absolute error. ME-mean error.

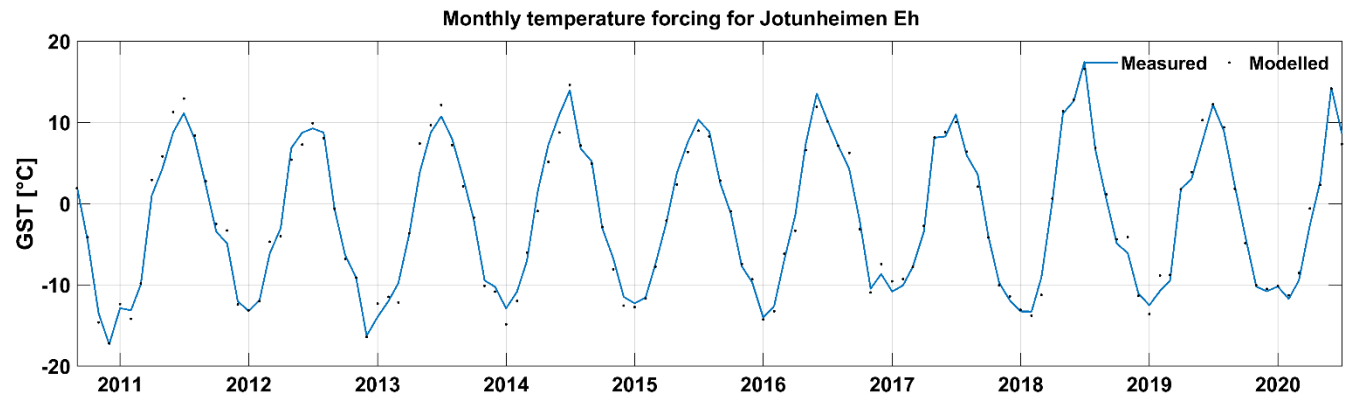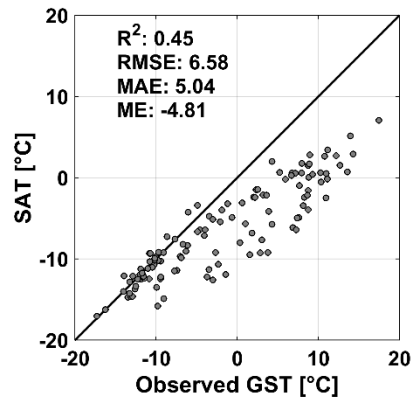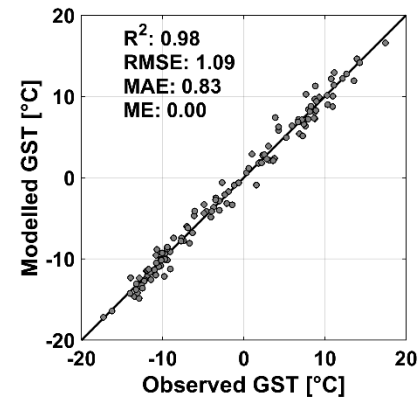

Supplementary Figure S12. Calibration for the higher east-facing logger at Jotunheimen. GST-ground surface temperature. SAT-surface air temperature. RMSE-root mean square error. MAE-mean absolute error. ME-mean error.

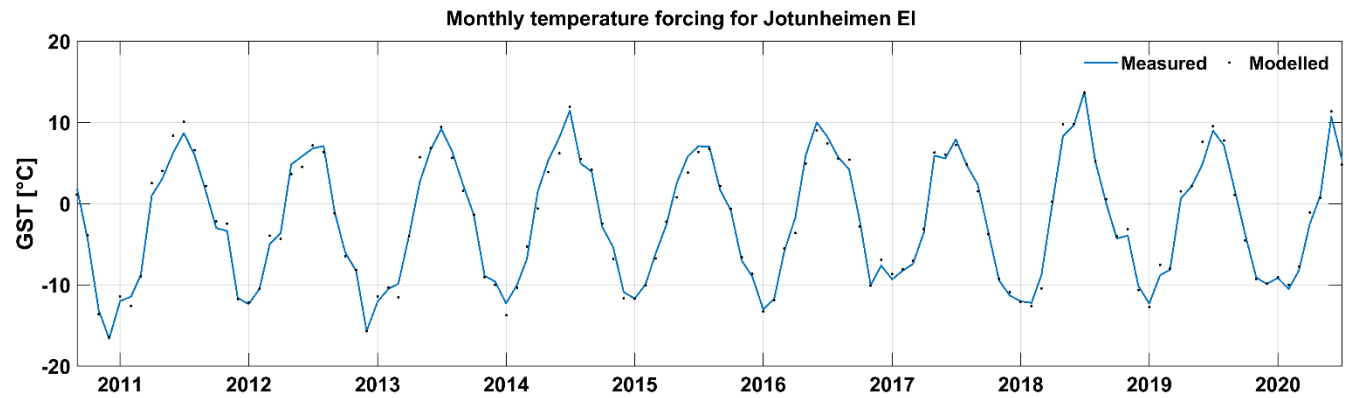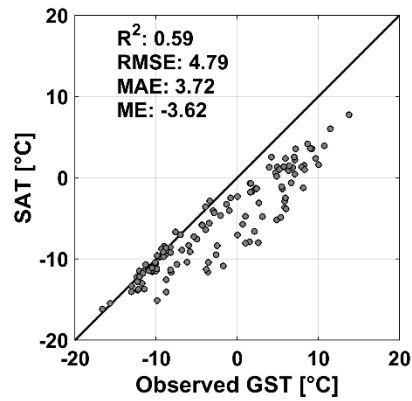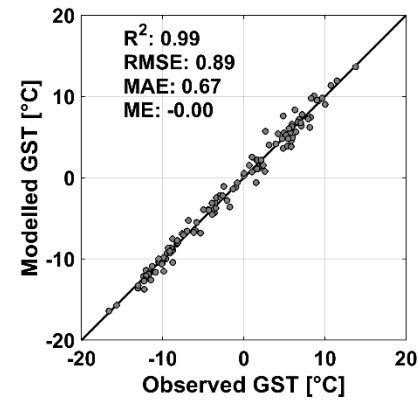

Supplementary Figure S13. Calibration for the lower east-facing logger at Jotunheimen. GST-ground surface temperature. SAT-surface air temperature. RMSE-root mean square error. MAE-mean absolute error. ME-mean error.

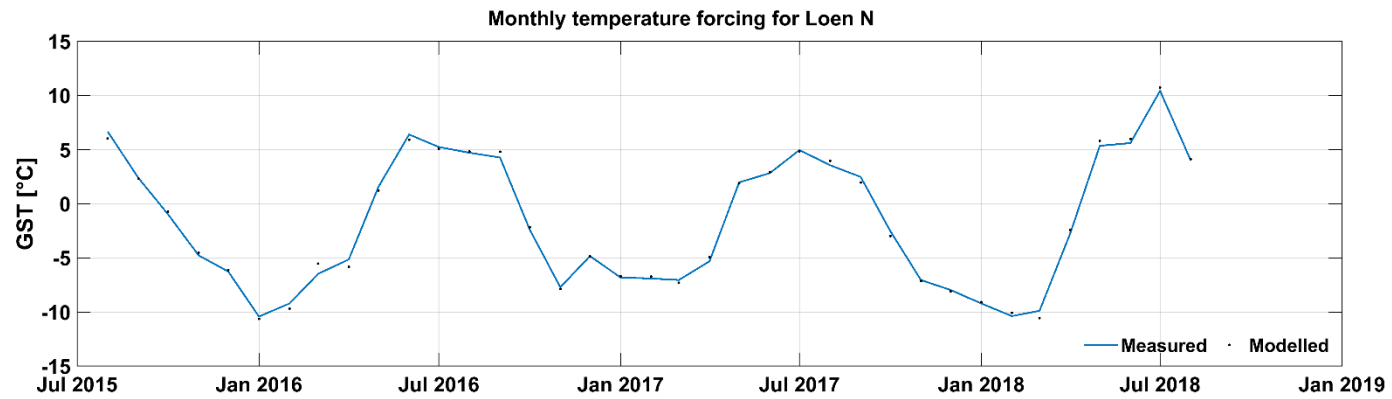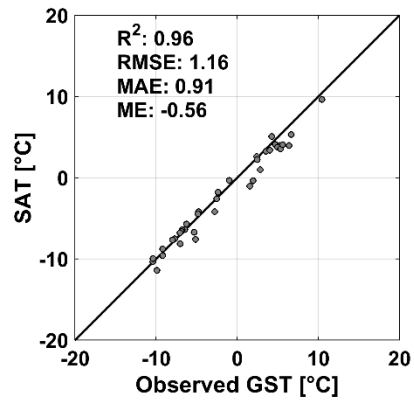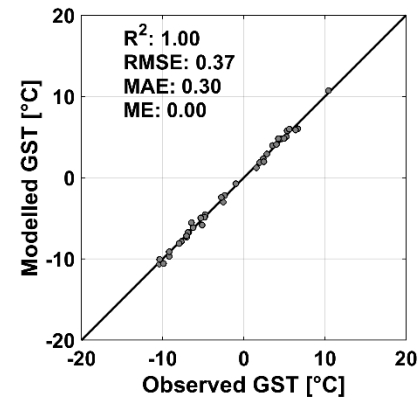

Supplementary Figure S14. Calibration for the north-facing logger at Loen. GST-ground surface temperature. SAT-surface air temperature. RMSE-root mean square error. MAE-mean absolute error. ME-mean error.

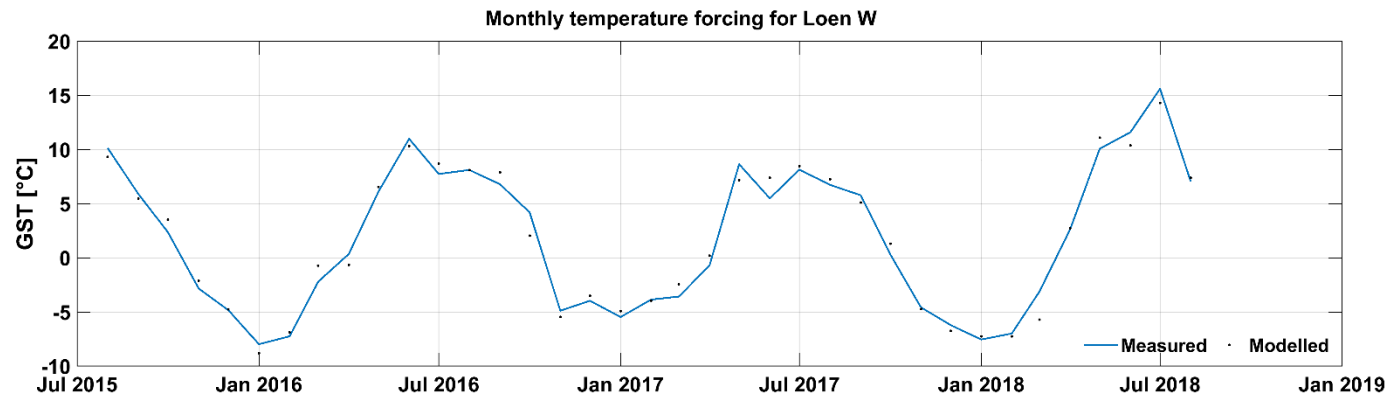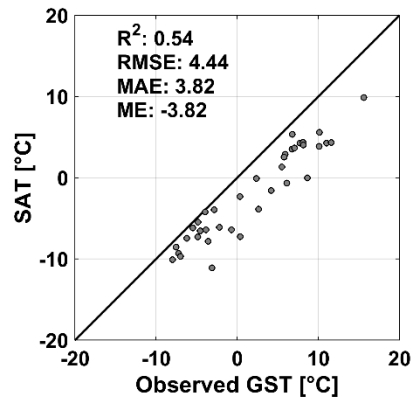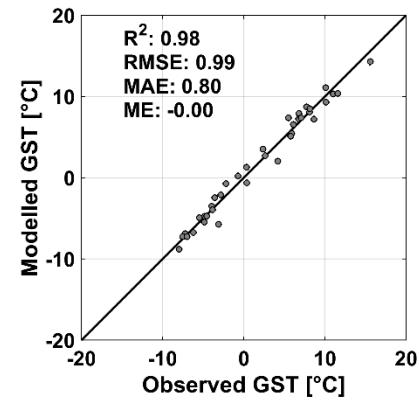

Supplementary Figure S15. Calibration for the west-facing logger at Loen. GST-ground surface temperature. SAT-surface air temperature. RMSE-root mean square error. MAE-mean absolute error. ME-mean error.



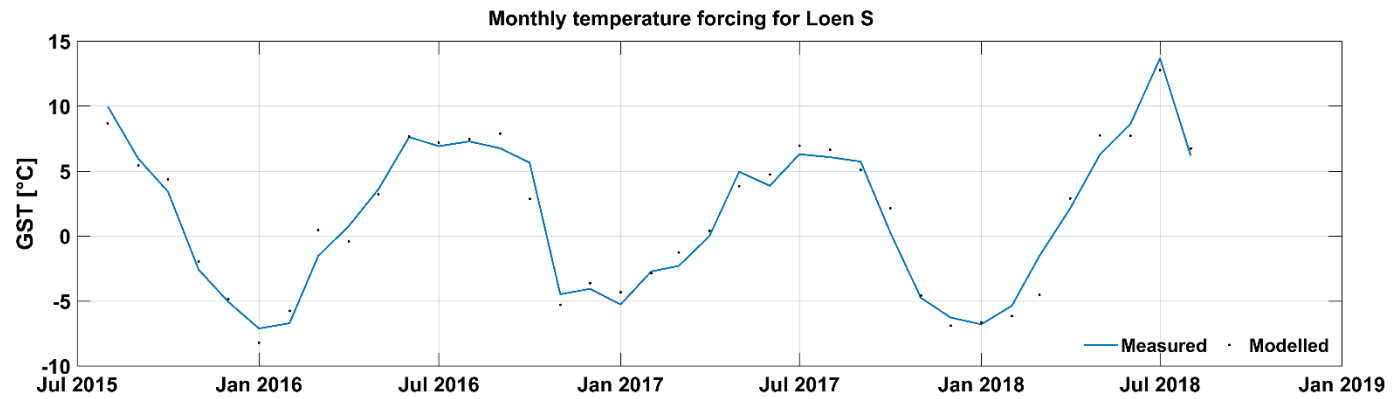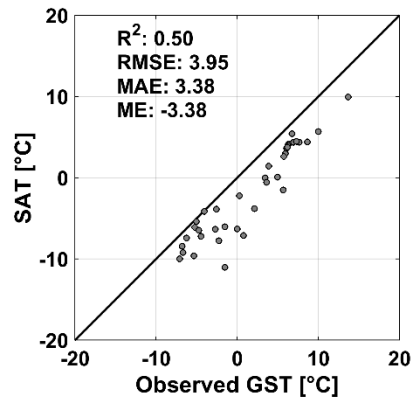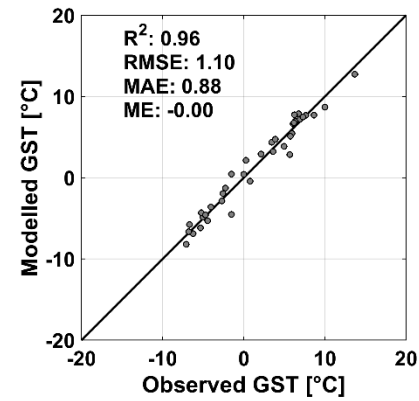

Supplementary Figure S16. Calibration for the south-facing logger at Loen. GST-ground surface temperature. SAT-surface air temperature. RMSE-root mean square error. MAE-mean absolute error. ME-mean error.

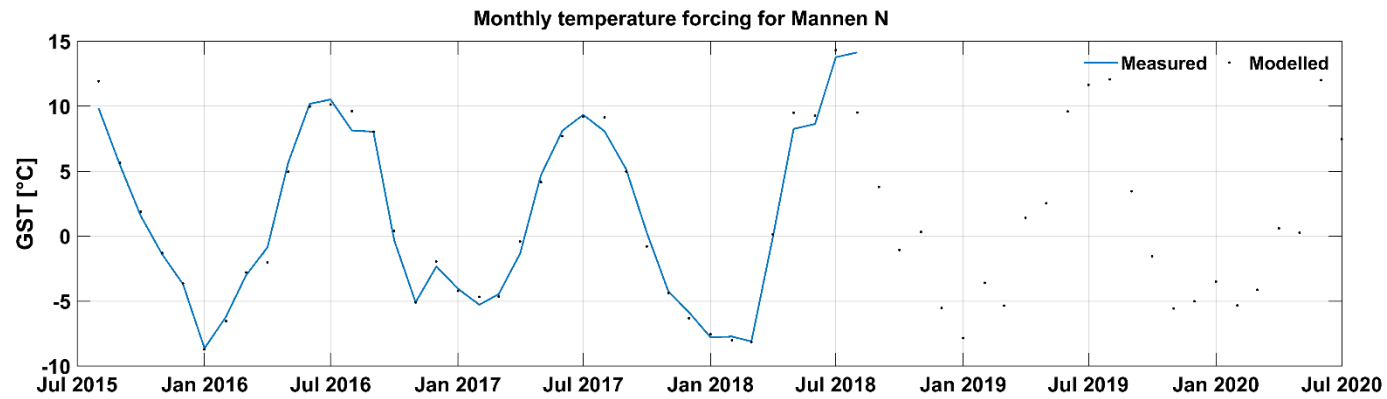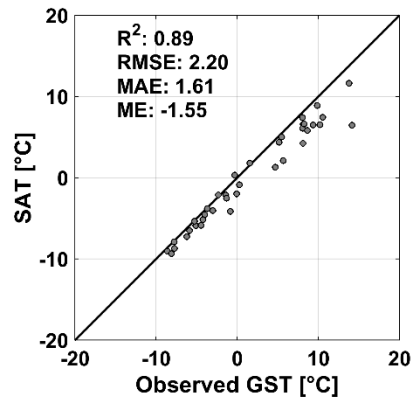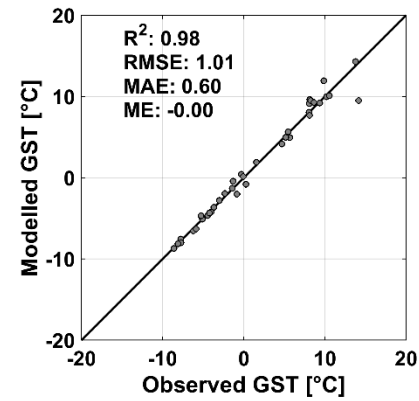

Supplementary Figure S17. Calibration for the north-facing logger at Mannen. GST-ground surface temperature. SAT-surface air temperature. RMSE-root mean square error. MAE-mean absolute error. ME-mean error.

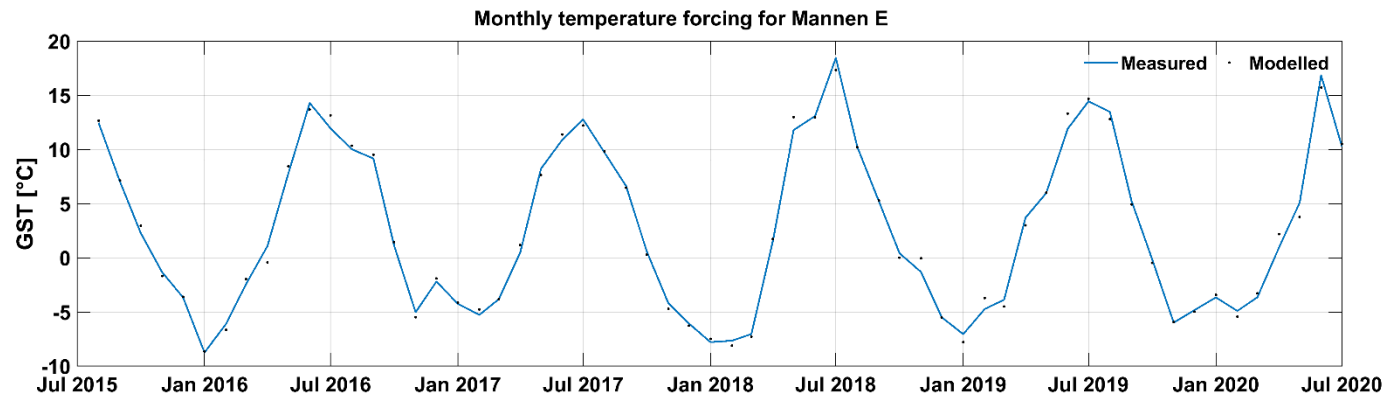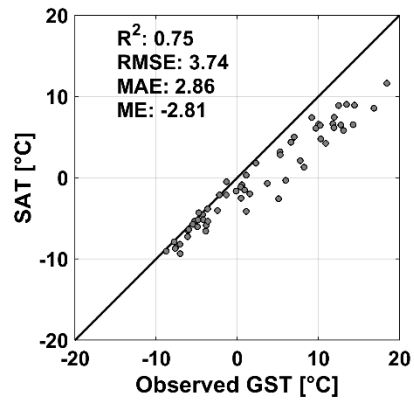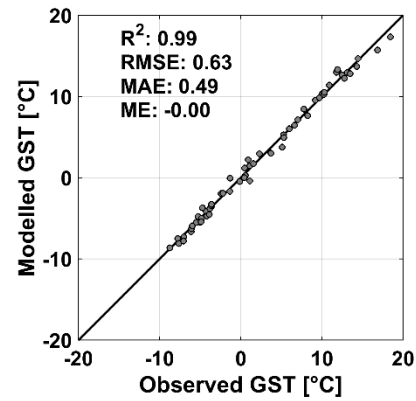

Supplementary Figure S18. Calibration for the east-facing logger at Mannen. GST-ground surface temperature. SAT-surface air temperature. RMSE-root mean square error. MAE-mean absolute error. ME-mean error.

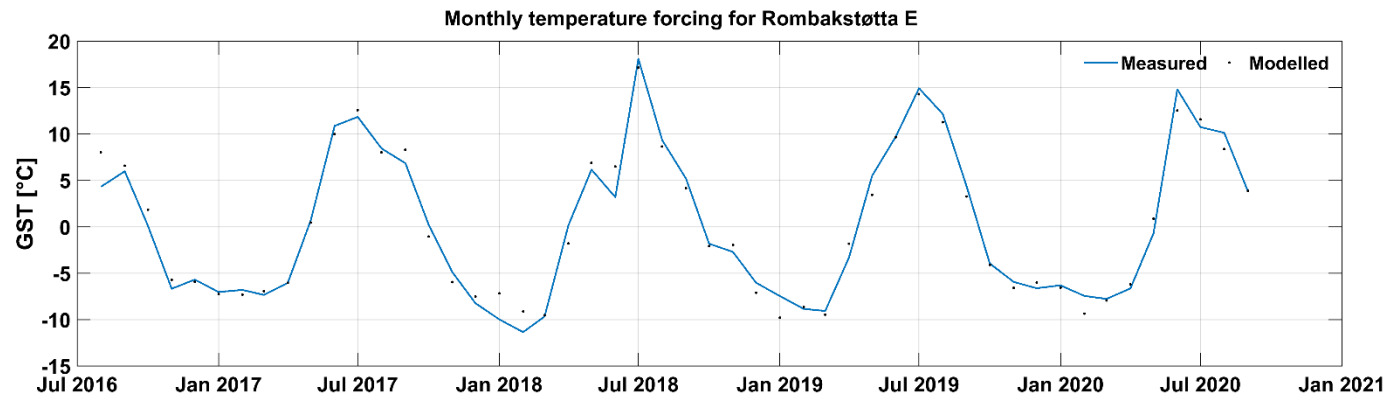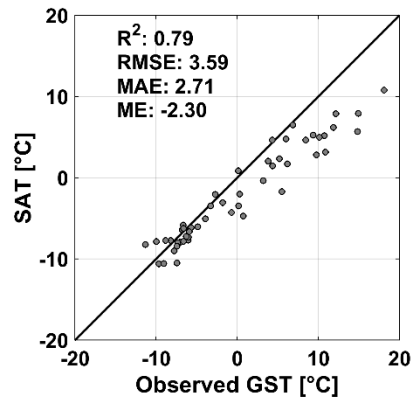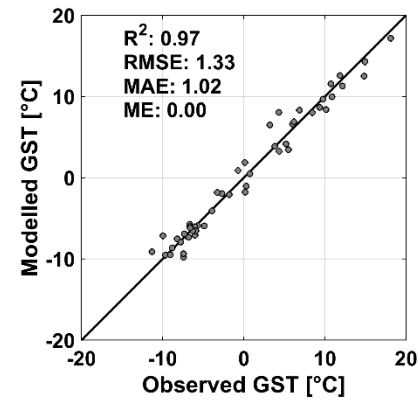

Supplementary Figure S19. Calibration for the east-facing logger at Rombakstøtta. GST-ground surface temperature. SAT-surface air temperature. RMSE-root mean square error. MAE-mean absolute error. ME-mean error.

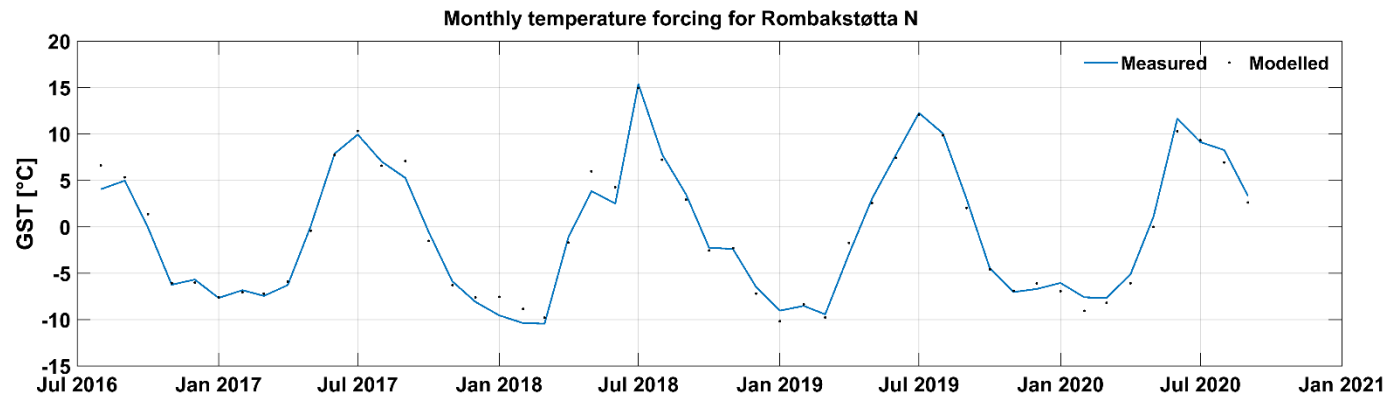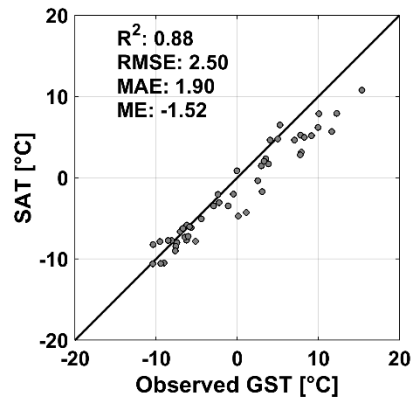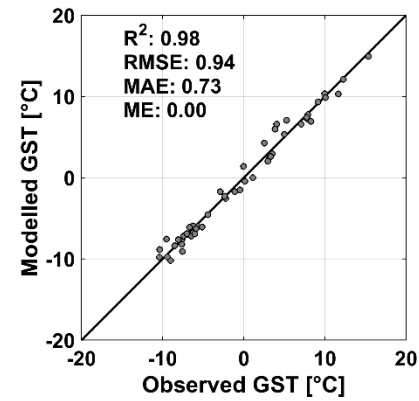

Supplementary Figure S20. Calibration for the north-facing logger at Rombakstøtta. GST-ground surface temperature. SAT-surface air temperature. RMSE-root mean square error. MAE-mean absolute error. ME-mean error.

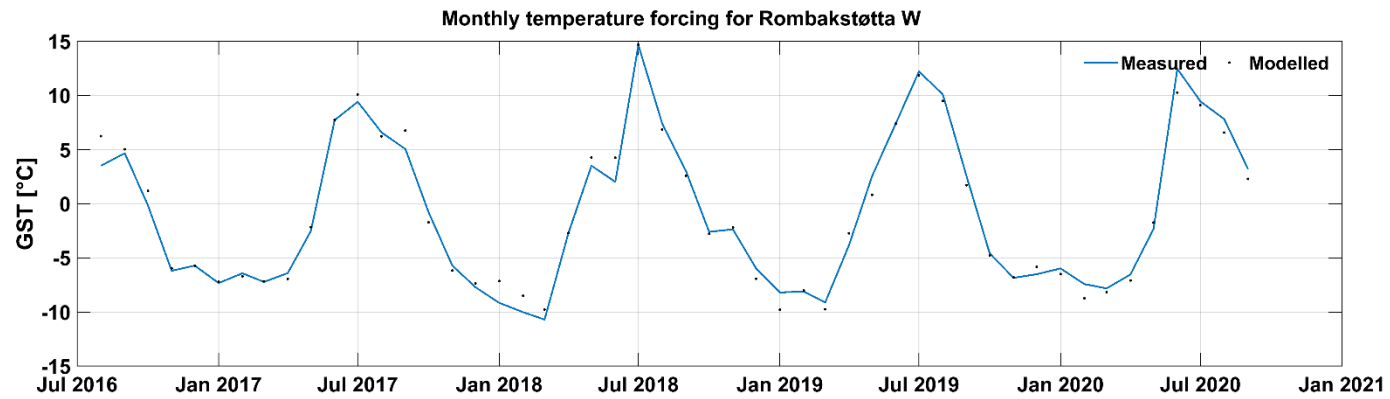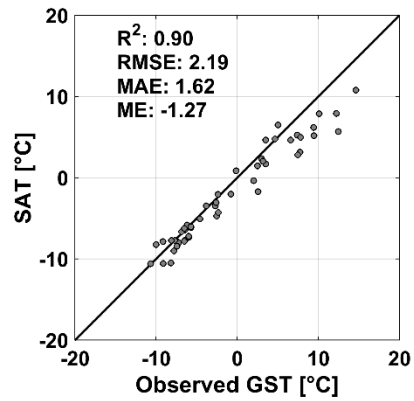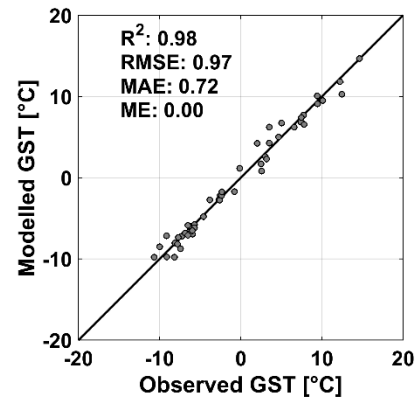

Supplementary Figure S21. Calibration for the west-facing logger at Rombakstøtta. GST-ground surface temperature. SAT-surface air temperature. RMSE-root mean square error. MAE-mean absolute error. ME-mean error.

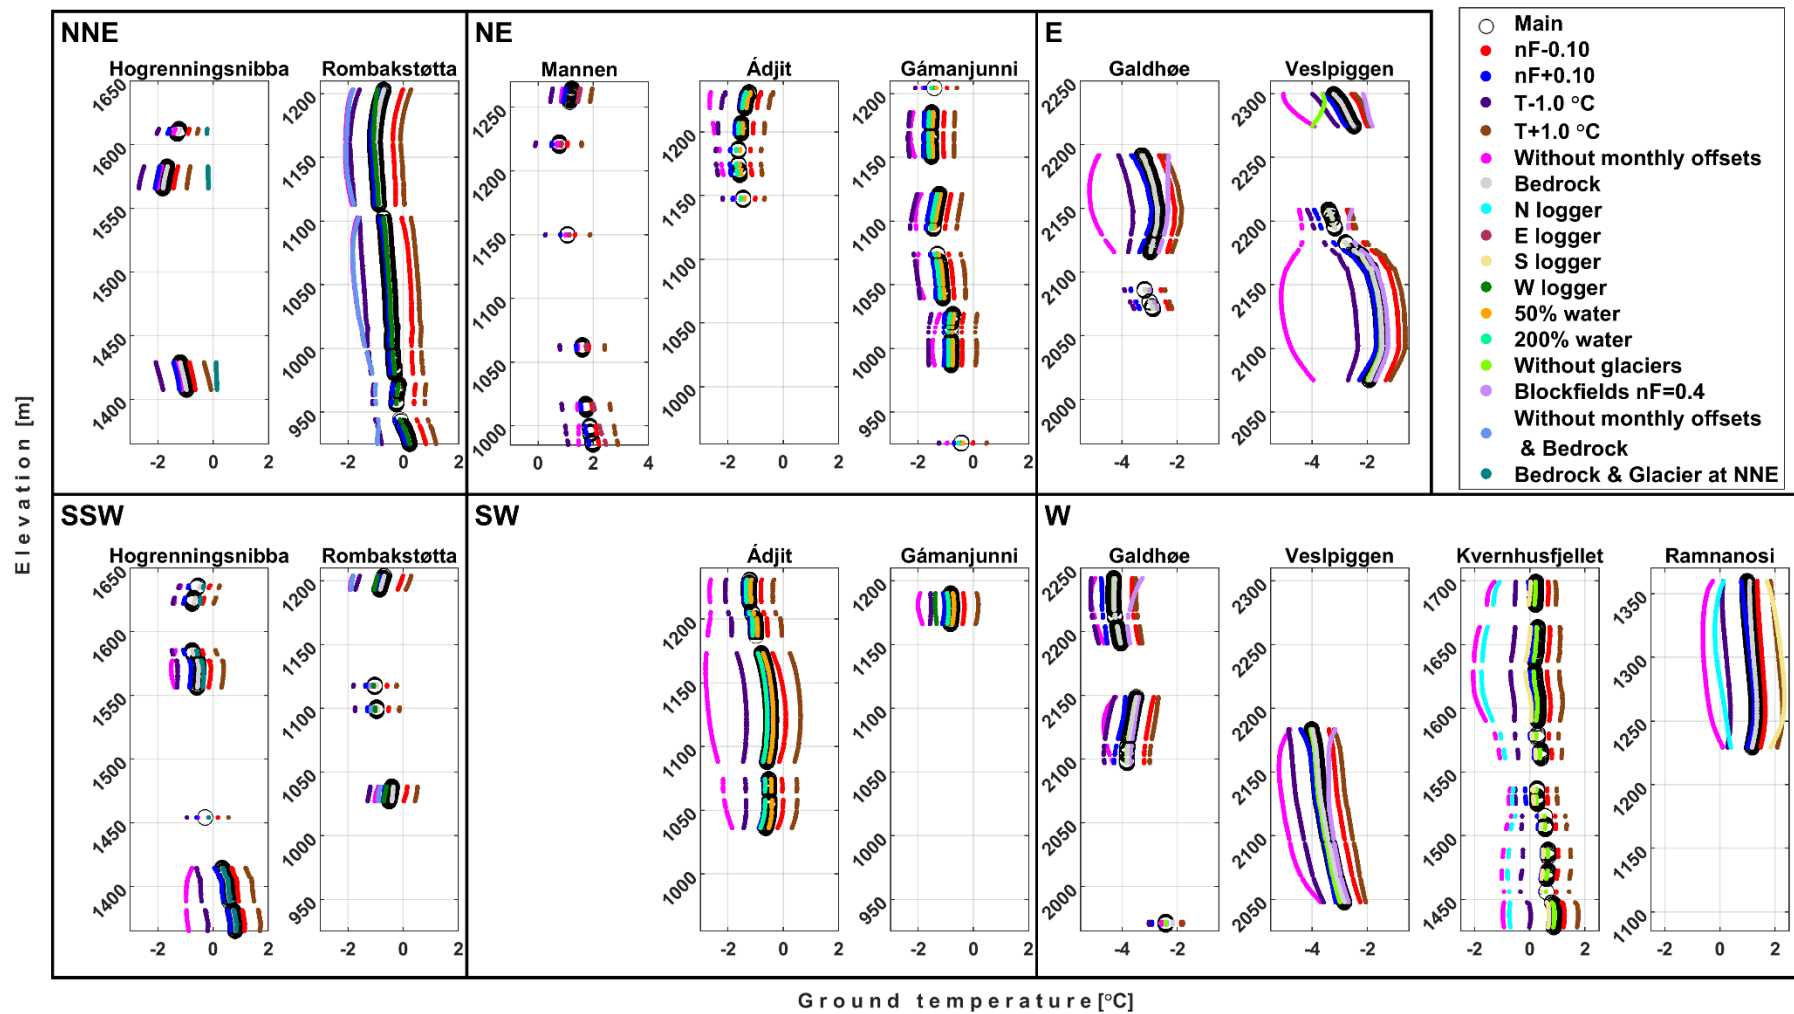

Supplementary Figure S22. Ground temperature in rock walls at 20 m depth for various simulations over the 2010s. A cluster of values without any break elevation-wise usually represents a single rock wall.

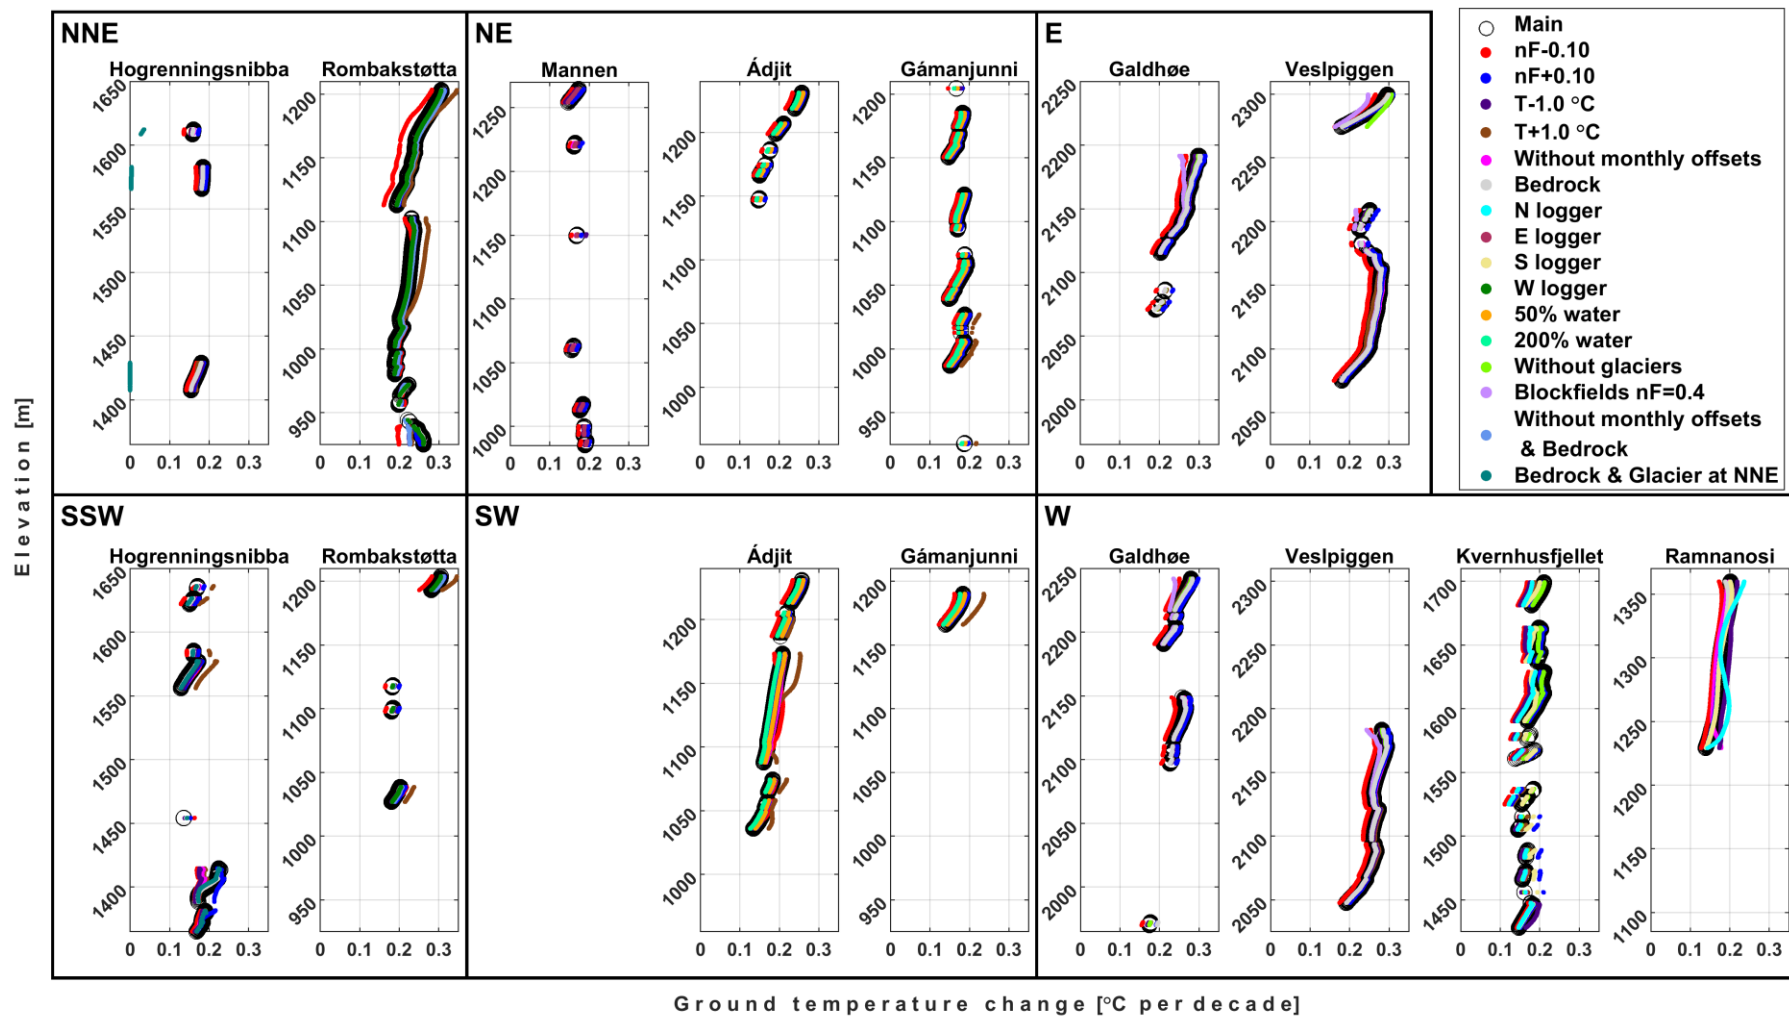

Supplementary Figure S23. Rates of ground temperature change in rock walls at 20 m depth for various simulations between the 1980s and 2010s. A cluster of values without any break elevation-wise usually represents a single rock wall.



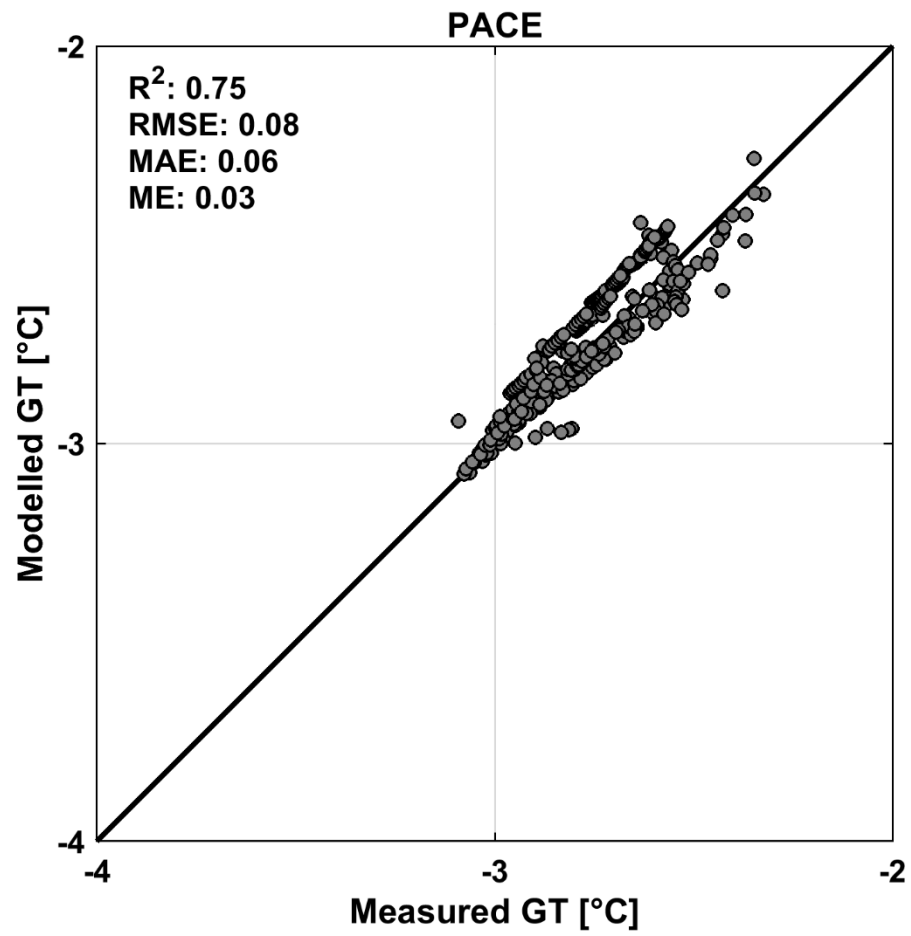

Supplementary Figure S24. Comparison of annual modelled ground temperature (GT) at depths between 5 and 100 m along the Galdhøe profile to ground temperatures measured in PACE borehole in the Jotunheimen Mountains. RMSE-root mean square error, MAE-mean absolute error, ME-mean error. Refer to Figure 1 in the main text for the borehole location.

(a) Electrical resistivity tomography from Isaksen et al. (2011)

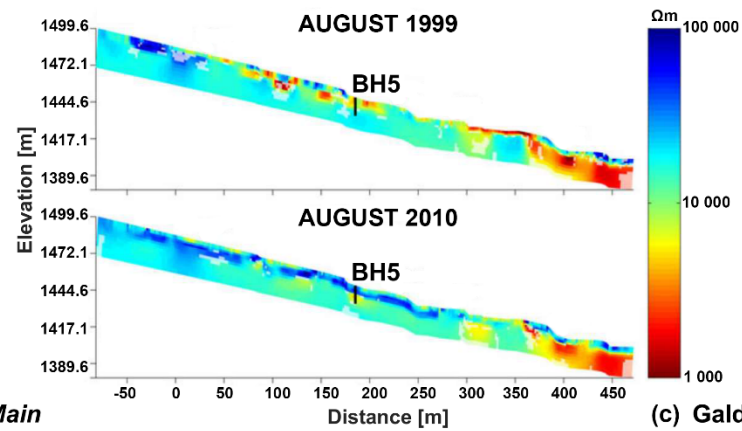

(b) Galdhøe; Main

(c) Galdhøe;  $nF+0.10$

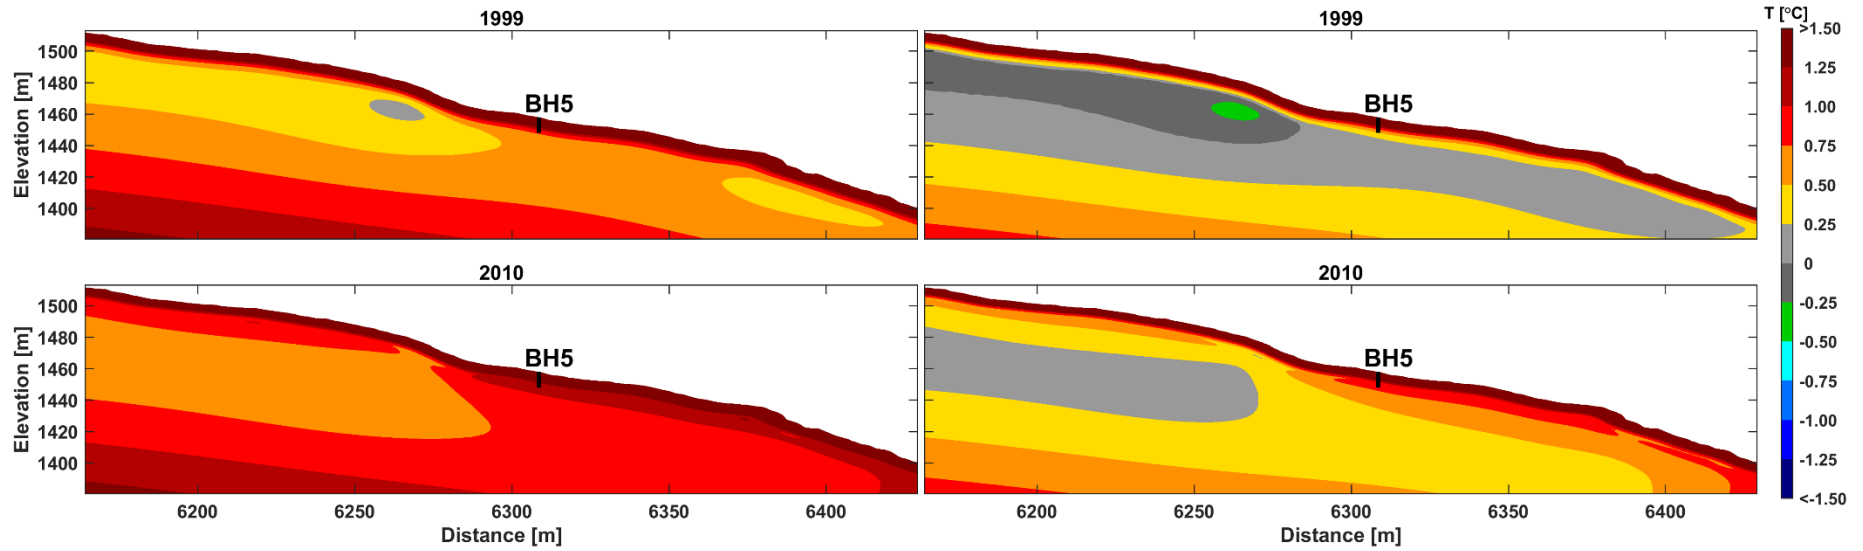

Supplementary Figure S25. Comparison of modelled maximum annual ground temperature along the Galdhøe profile (subplots (b) and (c)) to electrical resistivity tomography (ERT) profiles modified from Isaksen et al. (2011) shown in subplots (a) for years 1999 and 2010. Main simulation is shown in subplots (b) and “ $nF+0.1$ ” simulation is shown in subplots (c).

## Supplementary Tables

Supplementary Table S1. Assumed depths of subsurface layers, along with volumetric fractions of the soil constituents for each layer:  $\theta_w$  – volumetric water content;  $\theta_m$  – volumetric mineral content;  $\theta_o$  – volumetric content of organic matter;  $\theta_a$  – volumetric air content;  $z$  – depth. All sediment classes are underlain by bedrock with the same ground composition as bedrock class (“a”).

5  
10

| $z$ [m]                                                                        | $\theta_w$ [-] | $\theta_m$ [-] | $\theta_o$ [-] | $\theta_a$ [-] |
|--------------------------------------------------------------------------------|----------------|----------------|----------------|----------------|
| <b>“a”:</b> Bedrock (NGU code 130)                                             |                |                |                |                |
| >0.0                                                                           | 0.05           | 0.95           | 0.00           | 0.00           |
| <b>“b”:</b> Thin till (NGU code 12);                                           |                |                |                |                |
| <b>“c”:</b> Thin colluvium (NGU code 82)                                       |                |                |                |                |
| 0.0–1.0                                                                        | 0.30           | 0.60           | 0.00           | 0.10           |
| <b>“d”:</b> Medium thick till                                                  |                |                |                |                |
| 0.0–1.0                                                                        | 0.30           | 0.60           | 0.00           | 0.10           |
| 1.0–2.0                                                                        | 0.40           | 0.60           | 0.00           | 0.00           |
| <b>“e”:</b> Thick till (NGU code 11);                                          |                |                |                |                |
| <b>“f”:</b> Thick colluvium (NGU code 81)                                      |                |                |                |                |
| 0.0–2.0                                                                        | 0.30           | 0.60           | 0.00           | 0.10           |
| 2.0–10.0                                                                       | 0.40           | 0.60           | 0.00           | 0.00           |
| <b>“g”:</b> Weathered material                                                 |                |                |                |                |
| 0.0–2.0                                                                        | 0.10           | 0.60           | 0.00           | 0.30           |
| <b>“h”:</b> Thin organic cover over bedrock or shallow regolith (NGU code 100) |                |                |                |                |
| 0.0–0.5                                                                        | 0.40           | 0.50           | 0.10           | 0.00           |
| <b>“i”:</b> Thin regolith (NGU code 72)                                        |                |                |                |                |
| 0.0–1.0                                                                        | 0.10           | 0.60           | 0.00           | 0.30           |
| 1.0–2.0                                                                        | 0.40           | 0.60           | 0.00           | 0.00           |
| <b>“j”:</b> Medium thick regolith                                              |                |                |                |                |
| 0.0–1.0                                                                        | 0.20           | 0.60           | 0.00           | 0.20           |
| 1.0–4.0                                                                        | 0.40           | 0.60           | 0.00           | 0.00           |
| <b>“k”:</b> Fluvial/Alluvial sediments (NGU code 50)                           |                |                |                |                |
| 0.0–1.0                                                                        | 0.10           | 0.60           | 0.00           | 0.30           |
| 1.0–10.0                                                                       | 0.40           | 0.60           | 0.00           | 0.00           |
| <b>“l”:</b> Blockfields (NGU code 73)                                          |                |                |                |                |
| 0.0–2.0                                                                        | 0.10           | 0.60           | 0.00           | 0.30           |

|                                        |      |      |      |      |
|----------------------------------------|------|------|------|------|
| 2.0–5.0                                | 0.40 | 0.60 | 0.00 | 0.00 |
| <b>“m”:</b> Rock glacier (NGU code 88) |      |      |      |      |
| 0.0–2.0                                | 0.05 | 0.60 | 0.00 | 0.35 |
| 2.0–5.0                                | 0.10 | 0.60 | 0.00 | 0.30 |
| 5.0–35.0                               | 0.40 | 0.60 | 0.00 | 0.00 |
| <b>“n”:</b> Scree                      |      |      |      |      |
| 0.0–5.0                                | 0.02 | 0.40 | 0.00 | 0.58 |
| 5.0–various depths                     | 0.60 | 0.40 | 0.00 | 0.00 |
| <b>“o”:</b> Fractured bedrock          |      |      |      |      |
| 0.0–10.0                               | 0.05 | 0.80 | 0.00 | 0.15 |
| 10.0–various depths                    | 0.10 | 0.90 | 0.00 | 0.00 |
| <b>“p”:</b> Heavily fractured bedrock  |      |      |      |      |
| 0.0–10.0                               | 0.05 | 0.75 | 0.00 | 0.20 |
| 10.0–various depths                    | 0.15 | 0.80 | 0.00 | 0.05 |
| <b>“q”:</b> Very thick colluvium       |      |      |      |      |
| 0.0–2.0                                | 0.05 | 0.60 | 0.00 | 0.35 |
| 2.0–5.0                                | 0.10 | 0.60 | 0.00 | 0.30 |
| 5.0–30.0                               | 0.40 | 0.60 | 0.00 | 0.00 |

**Supplementary Table S2. Thermal conductivity for the mineral fraction.**

| <b>Mountain, municipality</b> | <b>Thermal conductivity<br/>[W m<sup>-1</sup> K<sup>-1</sup>]</b> |
|-------------------------------|-------------------------------------------------------------------|
| Mannen, Rauma                 | 2.5                                                               |
| Hogrenningsnibba, Stryn       | 2.3                                                               |
| Kvernhusfjellet, Stryn        | 2.3                                                               |
| Ramnanosi, Aurland            | 3.1                                                               |
| Veslpiggen, Lom               | 2.7                                                               |
| Galdhøe, Lom                  | 2.7                                                               |
| Gámanjunni 3, Kåfjord         | 2.9                                                               |
| Ádjit, Storfjord              | 2.9                                                               |
| Rombakstøtta, Narvik          | 2.9                                                               |

Supplementary Table S3. Surface air temperature records used to construct forcing along profiles.

| Mountain, municipality  | Meteorological station at the lower elevation along the profile (elevation; years with records) | Meteorological station on the mountain plateau (elevation; years with records) | Meteorological station(s) with the long-term temperature records (elevation; years with records) |
|-------------------------|-------------------------------------------------------------------------------------------------|--------------------------------------------------------------------------------|--------------------------------------------------------------------------------------------------|
| <b>Western Norway</b>   |                                                                                                 |                                                                                |                                                                                                  |
| Mannen, Rauma           | Marstein (67 m; 2010–present)                                                                   | Mannen (1294 m; 2010–present)                                                  | Bergen-Lungegårdshospitalet (17 m; 1861–1895); Bergen-Pleiestiftelsen (22 m; 1895–1926)          |
| Hogrenningsnibba, Stryn | seNorge (200 m; 1957–present)                                                                   | seNorge (1600 m; 1957–present)                                                 |                                                                                                  |
| Kvernhusfjellet, Stryn  |                                                                                                 |                                                                                |                                                                                                  |
| Ramnanosi, Aurland      | seNorge (40 m; 1957–present)                                                                    | Klevavatnet (960 m; 2014–present)                                              |                                                                                                  |
| <b>Jotunheimen</b>      |                                                                                                 |                                                                                |                                                                                                  |
| Veslpiggen, Lom         | Juvvasshøe (1894 m; 1999–present)                                                               | seNorge (2230 m; 1957–present)                                                 | Dombås II (643 m; 1864–1972)                                                                     |
| Galdhøe, Lom            |                                                                                                 |                                                                                |                                                                                                  |
| <b>Northern Norway</b>  |                                                                                                 |                                                                                |                                                                                                  |
| Gámanjunni 3, Kåfjord   | seNorge (250 m; 1957–present)                                                                   | Gámanjunni (1237 m; 2016–present)                                              | Tromsø I (38 m; 1872–1926)                                                                       |
| Ádjít, Storfjord        | Skibotn II (20 m; 2004–present)                                                                 |                                                                                |                                                                                                  |
| Rombakstøtta, Narvik    | Straumsnes (200 m; 2011–present)                                                                | Narvik-Fagernesfjellet (1000 m; 2014–present)                                  |                                                                                                  |

**Supplementary Table S4. Logger data. Mean ground surface temperature (GST) is computed as a mean value for the mentioned periods.**

| <b>Logger site and aspect</b> | <b>Mean GST [°C]</b> | <b>Period</b>     | <b>Elevation [m]</b> |
|-------------------------------|----------------------|-------------------|----------------------|
| Ádjít N                       | -1.80                | Aug 2015–Sep 2020 | 1230                 |
| Ádjít Sh (higher)             | 0.01                 | Aug 2015–Sep 2020 | 1245                 |
| Gámanjunni N                  | -1.31                | Aug 2015–Sep 2020 | 1243                 |
| Gámanjunni S                  | -0.08                | Aug 2015–Sep 2020 | 1220                 |
| Gámanjunni W                  | -1.62                | Aug 2015–Sep 2020 | 1183                 |
| Jotunheimen Eh (higher)       | -1.78                | Sep 2010–Jul 2020 | 2320                 |
| Jotunheimen El (lower)        | -2.15                | Sep 2010–Jul 2020 | 2204                 |
| Jotunheimen S                 | -2.23                | Sep 2010–Jul 2020 | 2226                 |
| Jotunheimen W                 | -3.55                | Sep 2010–Sep 2018 | 2179                 |
| Loen N                        | -1.77                | Aug 2015–Aug 2018 | 1709                 |
| Loen S                        | 1.40                 | Aug 2015–Aug 2018 | 1648                 |
| Loen W                        | 1.76                 | Aug 2015–Aug 2018 | 1662                 |
| Mannen E                      | 2.54                 | Aug 2015–Jul 2020 | 1290                 |
| Mannen N                      | 1.26                 | Aug 2015–Jul 2018 | 1290                 |
| Ramnanosi N                   | 0.02                 | Aug 2016–Jul 2020 | 1370                 |
| Ramnanosi S                   | 2.87                 | Aug 2016–Jul 2020 | 1370                 |
| Ramnanosi W                   | 1.55                 | Aug 2016–Jul 2020 | 1370                 |
| Rombakstøtta E                | 0.10                 | Aug 2016–Sep 2020 | 1228                 |
| Rombakstøtta N                | -0.71                | Aug 2016–Sep 2020 | 1224                 |
| Rombakstøtta W                | -0.96                | Aug 2016–Sep 2020 | 1208                 |

**Supplementary Table S5. Comparison of simulated ground temperatures at the Galdhøe profile and measured ground temperatures in the Jotunheimen Mountains over the 2010s. Refer to Figure 1 in the main manuscript for the borehole locations.**

| Borehole ID | Elevation [m] | Measured temperature at 10 m depth [°C] | Modelled temperature at 10 m depth [°C] in the various simulations |               |               | Smallest difference | Largest difference |
|-------------|---------------|-----------------------------------------|--------------------------------------------------------------------|---------------|---------------|---------------------|--------------------|
|             |               |                                         | <i>Main</i>                                                        | <i>nF-0.1</i> | <i>nF+0.1</i> |                     |                    |
| PACE        | 1894          | -2.64                                   | -2.44                                                              | -1.97         | -2.94         | 0.20                | 0.67               |
| BH1         | 1851          | -1.92                                   | -2.30                                                              | -1.83         | -2.75         | 0.09                | 0.83               |
| BH2         | 1771          | -1.29                                   | -1.74                                                              | -1.31         | -2.16         | 0.02                | 0.87               |
| BH3         | 1561          | -0.45                                   | 0.42                                                               | 0.80          | 0.02          | 0.47                | 1.25               |
| BH4         | 1559          | -0.51                                   | 0.42                                                               | 0.79          | 0.00          | 0.51                | 1.30               |
| BH5         | 1458          | 1.05                                    | 0.97                                                               | 1.33          | 0.62          | 0.08                | 0.43               |
